# Supplementary material for: Phage ΦPan70, a Putative Temperate Phage, Controls Pseudomonas aeruginosa in Planktonic, Biofilm and Burn Mouse Model Assays
Source: MDPI journal article supplement (doi:10.3390/v7082835), 2015-08-12
Supplement: s1 [file s1]

**Fig. S2. Movement speed of mice treated with  $\phi$ Pan70 at different times after *Pseudomonas aeruginosa* P4 infection**

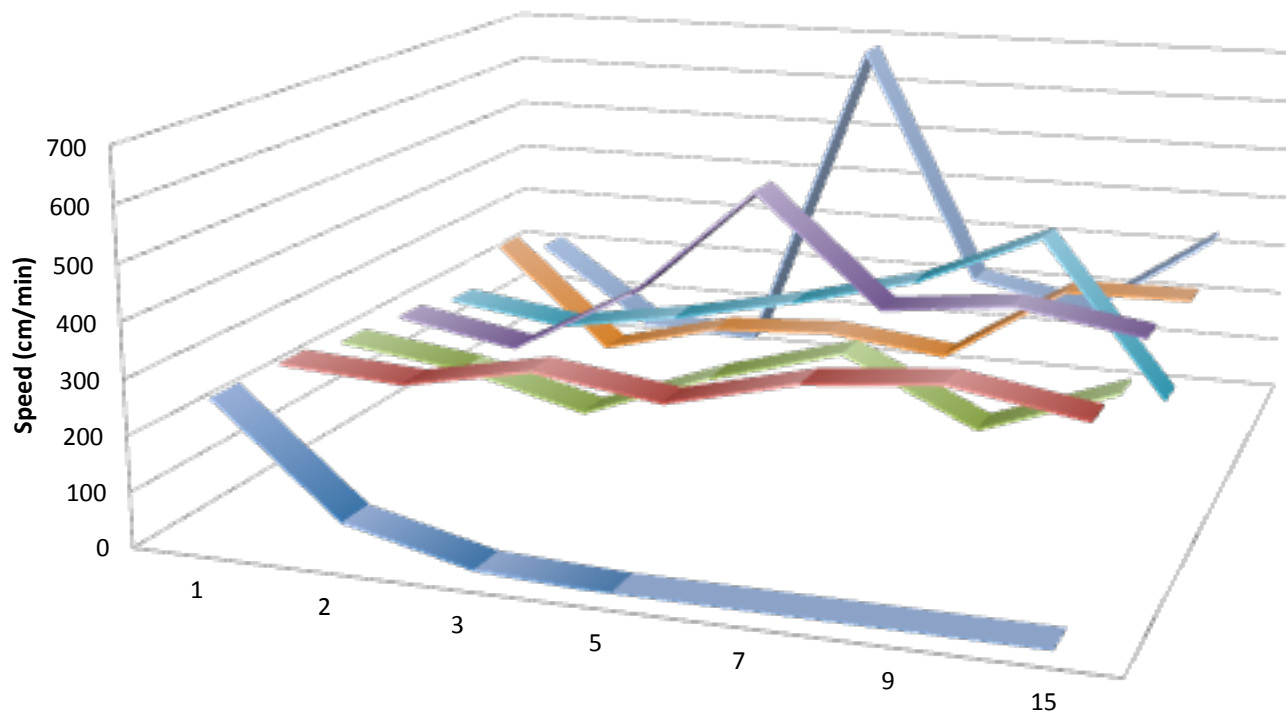

|                                  | 1     | 2     | 3     | 5     | 7     | 9     | 15    |
|----------------------------------|-------|-------|-------|-------|-------|-------|-------|
| bacteria only (positive control) | 259,4 | 65    | 9,8   | 0     | 0     | 0     | 0     |
| phage only                       | 256,1 | 242   | 288,1 | 256,3 | 313,6 | 336   | 298,8 |
| PBS (negative control)           | 234,5 | 205,3 | 147,5 | 235   | 302,6 | 190,4 | 278   |
| 0 min                            | 225,1 | 185,4 | 312,6 | 525,5 | 324,1 | 350,7 | 315,2 |
| 45 min                           | 201,8 | 170,3 | 208,6 | 259   | 320,3 | 424,3 | 132,9 |
| 24 h                             | 262,1 | 63,5  | 124,7 | 138,2 | 111,7 | 265   | 268,5 |
| 48 h                             | 211,4 | 54,8  | 45    | 679,8 | 215,9 | 169,3 | 333,8 |
