# Supplementary material for: Phage ΦPan70, a Putative Temperate Phage, Controls Pseudomonas aeruginosa in Planktonic, Biofilm and Burn Mouse Model Assays
Source: Viruses. 2015 Aug 12;7(8):4602–23. doi: 10.3390/v7082835 (PMC4576196; doi:10.3390/v7082835)
Supplement: Supplementary File 1 [file viruses-07-02835-s001.zip]

Archive with 9 entries (9 files):
- Fig. S3.pdf
- Table S1.xlsx
- Table S2.xlsx
- Table S3.docx
- Table S4.docx
- Table S5.xlsx
- Table S6.docx
- Fig. S1.pdf
- Fig. S2.pdf
