# Supplementary material for: Phage ΦPan70, a Putative Temperate Phage, Controls Pseudomonas aeruginosa in Planktonic, Biofilm and Burn Mouse Model Assays
Source: Viruses. 2015 Aug 12;7(8):4602–23. doi: 10.3390/v7082835 (PMC4576196; doi:10.3390/v7082835)
Supplement: Supplementary File 1 [file viruses-07-02835-s001.zip › Table S1.xlsx]

## Sheet: Hoja1
	Table S1. Antibiotic resistance profile of Pseudomonas aeruginosa strains P1, P3, P4
	Microorganism	Sample	Amp	Amp/Sul	Azt	Cef	Ceft	Ceftz	Ceph	Cipr	Gen	Imi	Nit	Mer	Pip	Ami
	P. aeruginosa P1	Tracheal aspirate	-	-	+	+	-	I	-	-	-	-	-	-	+	+
	P. aeruginosa P3	Urine	-	-	-	-	-	-	-	-	-	-	-	-	-	-
	P. aeruginosa P4	Urine	-	-	+	I	-	-	-	-	-	-	-	-	-	I
	*-: Resistant, +: Susceptible, I: Intermediate
	*Amp: Ampicillin, Amp/Sul: Ampicillin /Sulbactam, Azt: Aztreonam, Cef: Cefepime, Gen: Gentamicin, Imi: Imipenem, Nit: Nitrofurantoin, Mer: Meropenem, Pip: Piperacillin, Ami: Amikacin
	Ceft: Cefotaxime, Ceftz: Ceftazidime, Ceph: Cephalothin, Cipr: Ciprofloxacin
