# Supplementary material for: Phage ΦPan70, a Putative Temperate Phage, Controls Pseudomonas aeruginosa in Planktonic, Biofilm and Burn Mouse Model Assays
Source: Viruses. 2015 Aug 12;7(8):4602–23. doi: 10.3390/v7082835 (PMC4576196; doi:10.3390/v7082835)
Supplement: Supplementary File 1 [file viruses-07-02835-s001.zip › Table S2.xlsx]

## Sheet: Hoja1
Table S2. Primers used to close gaps in phiPan70 genome
Primer Name	Sequence	Size (bp)
PAN70 gap 19-20 fwd	ATCCACATCGCCTACC	16
PAN70 gap 19-20 rev	CAACTTCCGCCTCATC	16
PAN70 gap 20-21 fwd	CGAGGTGTTGTTGTACGA	18
PAN70 gap 20-21 rev	GGAAGTGTGGGTGAAAG	17
PAN70 LSPD-475F	AGCCAAATACCCGATACACC	20
PAN70 LSPD-2328R	ACACCCTTCGCCATCAC	17
PAN70 LSPD-1206F	TTTACCCGAAGTCCATCC	18
PAN70 LSPD-1696R	GAGGATGGTGTTGGTGAAG	19
PAN70 SSPD fwd	GAGGTTGGTTGTTGTTTTG	19
PAN70 SSPD rev	ATCTTGTAGCCGATGTTG	18
PAN70 right end fwd	CTCGCCTTCATCCTTACC	18
PAN70 right end rev	CACTCGATCCTCAGCACC	18
