# Supplementary material for: Phage ΦPan70, a Putative Temperate Phage, Controls Pseudomonas aeruginosa in Planktonic, Biofilm and Burn Mouse Model Assays
Source: Viruses. 2015 Aug 12;7(8):4602–23. doi: 10.3390/v7082835 (PMC4576196; doi:10.3390/v7082835)
Supplement: Supplementary File 1 [file viruses-07-02835-s001.zip › Table S5.xlsx]

## Sheet: Hoja3
	Table S5. Protein functions identified in the genome of bacteriophage ϕPan70 by sequence comparison to previously identified proteins using blastp. The most significant hit for each ORF are shown.* disrupted coding sequence due to the presence of potential sequencing errors associated to homopolymeric regions. ** partial CDS. ¶ The function of this ORF was supported by the detection of a conserve…
			Function	Coverage	Positives	E-value
		gp001	Small Subunit DNA Packaging Dimer (Pseudomonas Phage F10)	1	1	0
		gp002	Large Subunit DNA Packaging Dimer (Pseudomonas Phage F10)	0.9	1	3e-68
		gp004	Portal Protein (Pseudomonas Phage F10)	1	0.99	8e-121
		gp005*	Putative ClpP Protease (Pseudomonas Phage F10)	0.79	1	8e-89
		gp013*	Putative Tail Length Tape Measure Protein (P. aeruginosa LESB58)	0.7	0.98	5e-176
		gp017	Tail Fiber Protein (P. aeruginosa PA21_ST175)	1	1	4e-127
		gp028	DNA Modification Protein (Desulfovibrio vulgaris str. 'Miyazaki F')	0.89	0.68	1e-83
		gp029	Site Specific Recombinase (P. aeruginosa ATCC 700888)	0.85	0.91	1.12e-153
		gp040	Transposase (P. aeruginosa)	1	0.99	0
		gp043	LuxR Family Transcriptional Regulator (P. aeruginosa LESB58)	0.9	0.96	1e-71
		gp044	Transcriptional Regulator (P. aeruginosa ATCC 25324)	0.79	1	9.21e-161
		gp045¶	Repressor (Pseudomonas syringae)	0.51	0.65	4e-09
		gp052	Rha Family Phage Regulatory Protein (P. aeruginosa LESB58)	1	0.95	7e-112
		gp055	DNA Replication protein, DnaC (P. aeruginosa LESB58)	0.99	0.99	0
		gp056	Putative DnaB-like Replicative Helicase (P. aeruginosa LESB58)	0.92	0.97	0
		gp058	Putative Metallophosphoesterase (Pseudomonas Phage F10)	0.99	0.99	9.91e-164
		gp061	Holin (P. aeruginosa LESB58)	1	1	8e-66
		gp62**	Chitinase (P. aeruginosa LESB58)	1	0.96	3e-130
